# Supplementary material for: Co-ligand triphenylphosphine/alkynyl-stabilized undecagold nanocluster with a capped crown structure
Source: Royal Society of Chemistry journal article supplement (doi:10.1039/d2ra01080a), 2022-01-01
Supplement: d2ra01080a1.pdf [file d2ra01080a1.pdf]

## **Co-ligands Triphenylphosphine/Alkynyl-Stabilized Undecagold**

### **Nanocluster with a Capped Crown StructureExperimental**

Yan-Li Gao,\* Shiqing Bi, Yufei Wang, Jian Li, Ting Su and Xuchun Gao

\* School of Chemistry and Chemical Engineering, Yulin University, Yulin 719000, China. Email: gaoyanli8503@126.com.

#### **Supplementary Information**

**Table S1.** Crystallographic data of the gold cluster **1**.

|                                            |                                                                                                              |
|--------------------------------------------|--------------------------------------------------------------------------------------------------------------|
| Identification code                        | [Au <sub>11</sub> (PPh <sub>3</sub> ) <sub>8</sub> (C≡CPhCF <sub>3</sub> ) <sub>2</sub> ](SbF <sub>6</sub> ) |
| Formula                                    | C <sub>162</sub> H <sub>128</sub> Au <sub>11</sub> F <sub>12</sub> P <sub>8</sub> Sb                         |
| Formula weight                             | 4838.78                                                                                                      |
| Crystal size/mm <sup>3</sup>               | 0.2×0.06×0.03                                                                                                |
| Temperature/K                              | 150.2(1)                                                                                                     |
| Crystal system                             | Triclinic                                                                                                    |
| Space group                                | P -1                                                                                                         |
| a (Å)                                      | 16.0672(3)                                                                                                   |
| b (Å)                                      | 17.0707(3)                                                                                                   |
| c (Å)                                      | 32.9542(3)                                                                                                   |
| α (°)                                      | 80.8164(10)                                                                                                  |
| β (°)                                      | 82.7276(10)                                                                                                  |
| γ (°)                                      | 63.1499(17)                                                                                                  |
| V (Å <sup>3</sup> )                        | 7945.5(2)                                                                                                    |
| Z                                          | 2                                                                                                            |
| D <sub>c</sub> /(g·cm <sup>-3</sup> )      | 2.023                                                                                                        |
| F(000)                                     | 4496                                                                                                         |
| Radiation                                  | Cu Kα (λ= 1.54184 Å)                                                                                         |
| Theta (°) range                            | 2.722 to 65.693                                                                                              |
| Index ranges                               | -18 ≤ h ≤ 18, -20 ≤ k ≤ 20, -38 ≤ l ≤ 29                                                                     |
| Refls. Total                               | 26720                                                                                                        |
| Unique                                     | 23105                                                                                                        |
| Parameters                                 | 1773                                                                                                         |
| R <sub>int</sub>                           | 0.0628                                                                                                       |
| R <sub>1</sub> /wR <sub>2</sub> [I>2σ(I)]  | 0.0650/0.1760                                                                                                |
| R <sub>1</sub> /wR <sub>2</sub> (all data) | 0.0748/0.01851                                                                                               |
| Completeness                               | 0.973                                                                                                        |
| GoF                                        | 1.030                                                                                                        |

**Table S2** Selected bond lengths (Å) for compound **1**.

| Parameter    | value     | Parameter     | value     |
|--------------|-----------|---------------|-----------|
| Au(1)-Au(2)  | 2.6721(7) | Au(4)-Au(9)   | 2.9812(8) |
| Au(1)-Au(3)  | 2.7192(5) | Au(4)-Au(10)  | 2.9749(7) |
| Au(1)-Au(4)  | 2.7279(7) | Au(4)-C(1)    | 1.982(15) |
| Au(1)-Au(5)  | 2.6734(7) | Au(5)-Au(6)   | 3.2442(8) |
| Au(1)-Au(6)  | 2.6890(7) | Au(5)-Au(10)  | 2.9357(7) |
| Au(1)-Au(7)  | 2.7174(7) | Au(5)-Au(11)  | 3.2182(7) |
| Au(1)-Au(8)  | 2.6273(8) | Au(5)-P(3)    | 2.295(3)  |
| Au(1)-Au(9)  | 2.6938(7) | Au(6)-Au(7)   | 2.8722(9) |
| Au(1)-Au(10) | 2.6880(7) | Au(6)-Au(11)  | 2.9580(7) |
| Au(1)-Au(11) | 2.6559(7) | Au(6)-P(4)    | 2.305(3)  |
| Au(2)-Au(3)  | 2.8791(8) | Au(7)-Au(8)   | 2.9000(9) |
| Au(2)-Au(4)  | 3.0583(7) | Au(7)-C(2)    | 2.026(18) |
| Au(2)-Au(5)  | 2.9461(7) | Au(8)-Au(9)   | 2.9362(8) |
| Au(2)-Au(6)  | 2.9376(8) | Au(8)-Au(11)  | 3.0521(8) |
| Au(2)-Au(7)  | 3.3125(9) | Au(8)-P(6)    | 2.277(4)  |
| Au(2)-P(1)   | 2.283(4)  | Au(9)-Au(10)  | 2.9215(7) |
| Au(3)-Au(4)  | 2.9247(8) | Au(9)-P(7)    | 2.279(3)  |
| Au(3)-Au(7)  | 2.8062(8) | Au(10)-Au(11) | 2.8943(7) |
| Au(3)-Au(9)  | 2.8549(7) | Au(10)-P(8)   | 2.288(3)  |
| Au(3)-P(2)   | 2.271(3)  | Au(11)-P(5)   | 2.298(3)  |
| Au(4)-Au(5)  | 2.9781(7) |               |           |

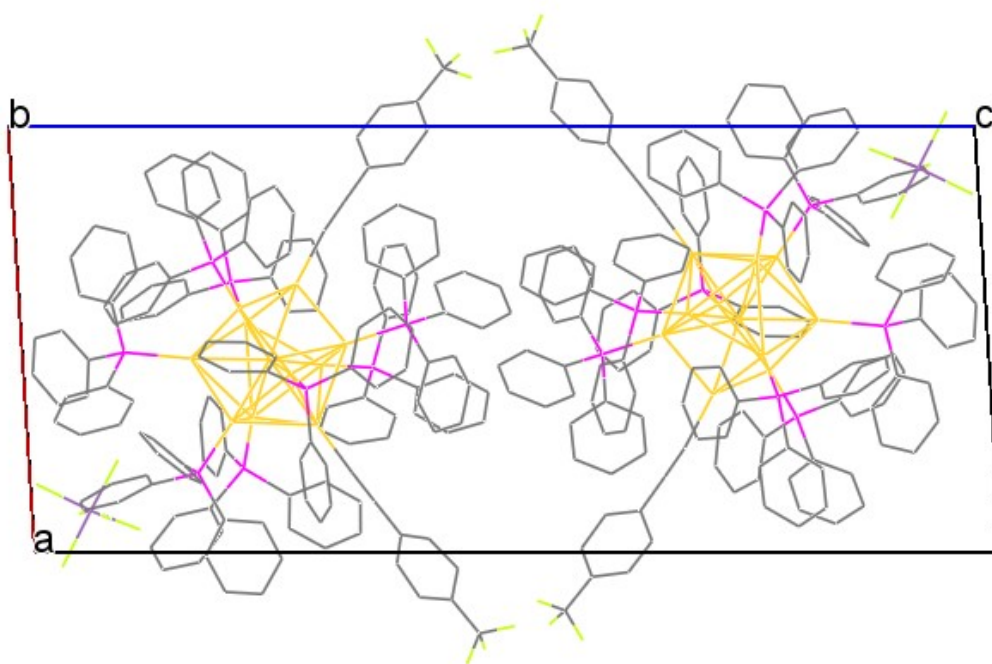

**Figure S1** Packing structure of  $[\text{Au}_{11}(\text{PPh}_3)_8(\text{C}\equiv\text{CPhCF}_3)_2](\text{SbF}_6)$  clusters in a unit cell along b-axis. Color legend: yellow spheres, Au; pink spheres, P; green spheres, F; grey spheres, C. All hydrogen atoms are omitted for clarity.

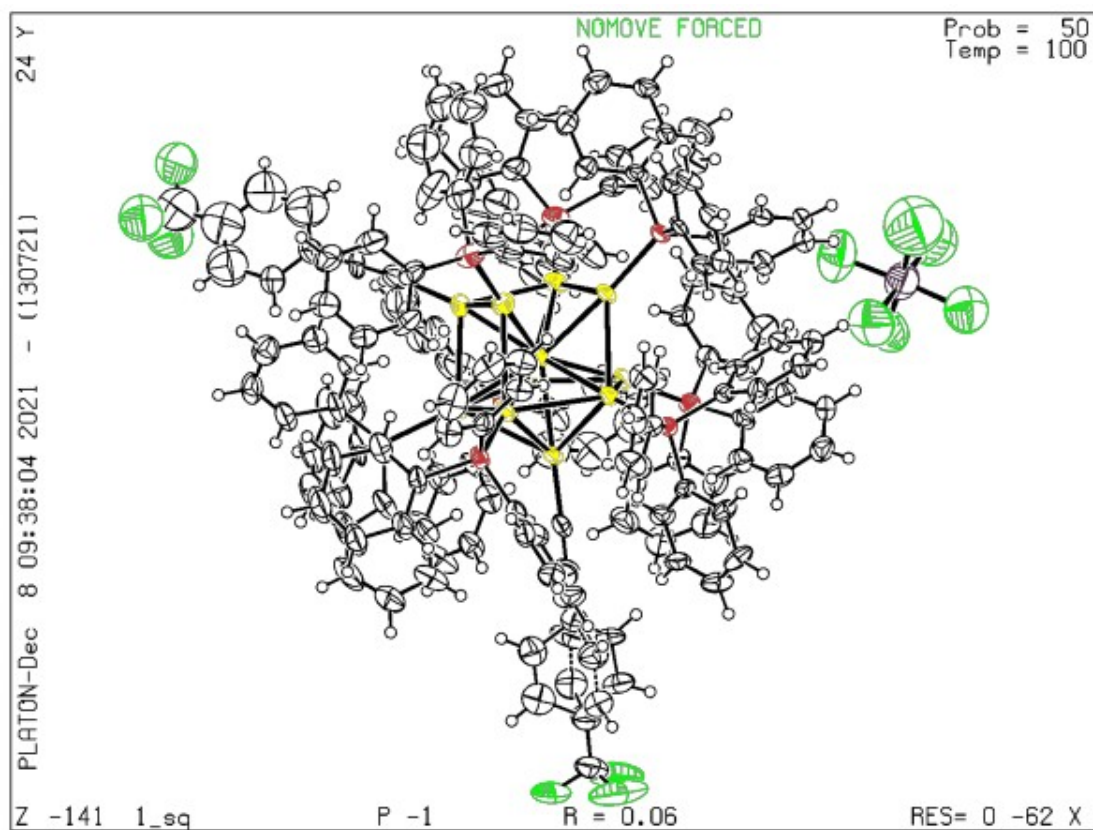

**Figure S2** ORTEP diagram of  $[\text{Au}_{11}(\text{PPh}_3)_8(\text{C}\equiv\text{CPhCF}_3)_2](\text{SbF}_6)$  (**1**) with the thermal ellipsoids at 50% probability.

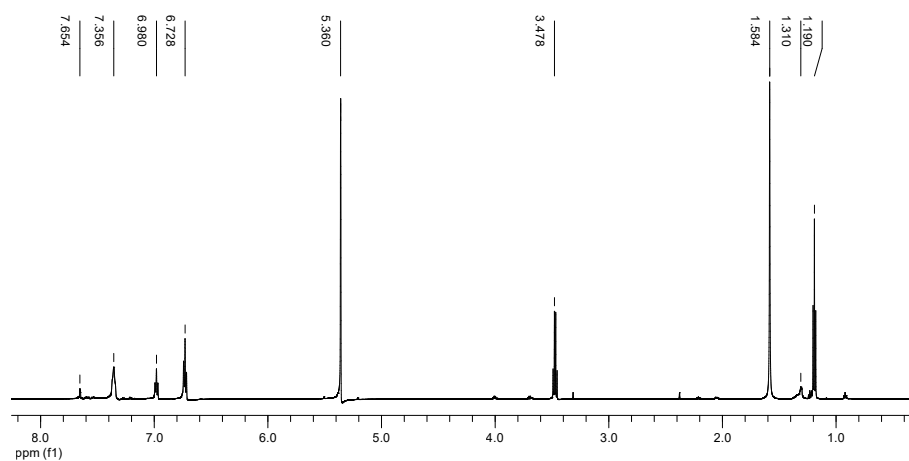

**Figure S3**  $^1\text{H}$  NMR for the pure triphenylphosphine/alkynyl-stabilized undecagold clusters recorded in  $\text{CDCl}_3$ .
